# Supplementary material for: Effect of Noise and Music on Neurotransmitters in the Amygdala: The Role Auditory Stimuli Play in Emotion Regulation
Source: MDPI journal article supplement (doi:10.3390/metabo13080928), 2023-08-08

**Supplementary Table S1** Primers used for qRT-PCR

| Gene                  | NCBI ID        | Primer                                                                            |
|-----------------------|----------------|-----------------------------------------------------------------------------------|
| Caspase3              | NM_214131.1    | Forward 5'-CCGGAATGGCATGTTCGATCT-3'<br>Reverse 5'-AGTCCAATTCTGTGCCTCGG-3'         |
| Bax                   | XM_003127290.5 | Forward 5'-GCCCTTTTGCTTCAGGGTTTC-3'<br>Reverse 5'-CAATGCGCTTGAGACACTCG-3'         |
| BCI2                  | XM_021099593.1 | Forward 5'-AAGCGAGTGGCCCAAGTTTA-3'<br>Reverse 5'-CTGCACTCAGGAGCATGACA-3'          |
| Caspase9              | XM_013998997.2 | Forward 5'-CAGTGGTGCTGGGGTCTAAG-3'<br>Reverse 5'-GGCCTTGGCAGTCAGGTT-3'            |
| TNF- $\alpha$         | NM_214022.1    | Forward 5'-GCACTGAGAGCATGATCCGAGAC-3'<br>Reverse 5'-CGACCAGGAGGAAGGAGAAGAGG-3'    |
| IL-1 $\beta$          | NM_001302388.2 | Forward 5'-CAAGCCAGAGAAGCAAGGTGTCC-3'<br>Reverse 5'-GCCGTCCTCAGCAGCAAGAAG-3'      |
| TLR4                  | NM_001113039.2 | Forward 5'-GACGAAGACTGGGTGAGGAATGAAC-3'<br>Reverse 5'-CCTGGATGATGTTAGCAGCGATGG-3' |
| MyD88                 | NM_001099923.1 | Forward 5'-CTGCGTCTGGTCCATTGCTAGTG-3'<br>Reverse 5'-TTCTGATGGGCACCTGGAGAGAG-3'    |
| I $\kappa$ B $\alpha$ | NM_001005150.1 | Forward 5'-TGGTGTGCTCTTGTGAAGTGTG-3'<br>Reverse 5'-GCTGCTGTATCCGAGTGCTTGG-3'      |
| NF- $\kappa$ B (p65)  | NM_001114281.1 | Forward 5'-CTGAGGCTATAACTCGCTTGGTGAC-3'<br>Reverse 5'-CATGTCCGCAATGGAGGAGAAGTC-3' |
| IL-6                  | NM_001252429.1 | Forward 5'-AAATGTCGAGGCCGTGCAGATTAG-3'<br>Reverse 5'-GGGTGGTGGCTTTGTCTGGATTG-3'   |
| IL-10                 | NM_214041.1    | Forward 5'-CAGCAAGCTCCAGCTCATCCATC-3'<br>Reverse 5'-CAGCAGAAGCAGCAGTGACAGG-3'     |
| IL-12                 | NM_214097.2    | Forward 5'-TCTCCCCCAAATCACATCCAATAA-3'<br>Reverse 5'-TTTCCCGGCTTTGAGTCAGG-3'      |
| Nrf1                  | XM_021078993.1 | Forward 5'-GAAGCTGTCCAGGGGCTTTA-3'<br>Reverse 5'-ATCCATGCTCTGCTACTGGG-3'          |
| HO-1                  | NM_001004027.1 | Forward 5'-TGGCGTCCTTGTAACCATC-3'<br>Reverse 5'-GTCACGGGAGTGGAGTCTTG-3'           |
| CAT                   | NM_214301.2    | Forward 5'-CCTGCAACGTTCTGTAAGGC-3'<br>Reverse 5'-GCTTCATCTGGTCACTGGCT-3'          |
| SOD1                  | NM_001190422.1 | Forward 5'-CAGGGCACCATCTACTTCGAG-3'<br>Reverse 5'-TTACACCACAGGCCAAACGA-3'         |
| $\beta$ -actin        | XM_021086047.1 | Forward 5'-GGCACCACACCTTCTACAACGAG-3'<br>Reverse 5'-TCATCTTCTCACGGTTGGCTTTGG-3'   |

**Supplementary Table S2** Antibodies used for western blot

| Primary antibodies | Dilution ratio |
|--------------------|----------------|
| Bax                | 1:1000         |
| Caspase3           | 1:1000         |
| Caspase9           | 1:1000         |
| BCl2               | 1:1000         |
| GAPDH              | 1:1500         |

**Figure S1** Equal-sized pens of each room.

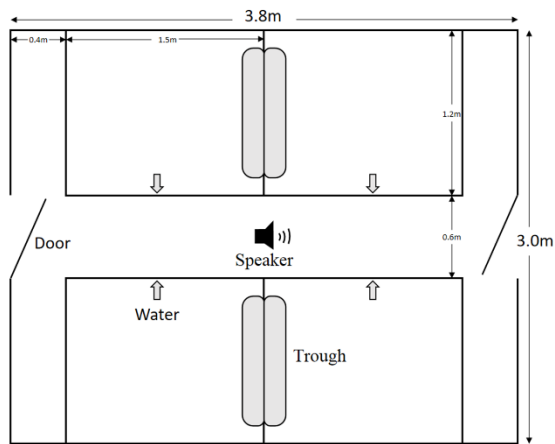

Supplement: s1 [file s1]
